# Supplementary material for: Comparing Laparoscopic Elective Sigmoid Resection With Conservative Treatment in Improving Quality of Life of Patients With Diverticulitis: The Laparoscopic Elective Sigmoid Resection Following Diverticulitis (LASER) Randomized Clinical Trial
Source: PubMed Central journal article supplement (PMC7675217; doi:10.1001/jamasurg.2020.5151), 2020-11-18
Supplement: jamasurg-e205151-s003.pdf [file jamasurg-e205151-s003.pdf]

## Data Sharing Statement

Santos. Comparing Laparoscopic Elective Sigmoid Resection With Conservative Treatment in Improving Quality of Life of Patients With Diverticulitis. *JAMA Surg*. Published November 18, 2020.

10.1001/jamasurg.2020.5151

### Data

**Data available:** No

### Additional Information

**Explanation for why data not available:** Study permissions do not permit sharing individual patient data
